# Supplementary material
Source: PubMed Central journal article supplement (PMC5737128)
Supplement: ba010223-suppl1.pdf [file ba010223-suppl1.pdf]

## Appendix

### Chief investigators at participating sites

- Prof Peter J. Shaw  
Children's Hospital Westmead, Westmead, New South Wales, Australia
- Dr Matthew Greenwood  
Royal North Shore Hospital, St Leonards, New South Wales, Australia
- Associate Professor Tracey O'Brien  
Sydney Children's Hospital, Randwick, New South Wales, Australia
- Dr Chris Fraser  
Lady Cilento Children's Hospital, Brisbane, Queensland, Australia
- Dr Agnes Yong  
Royal Adelaide Hospital, Adelaide, South Australia, Australia
- Dr Lochie Teague  
Starship Children's Hospital, Auckland, New Zealand
- Prof David Gottlieb  
Westmead Hospital, Westmead, New South Wales, Australia

## Methods

### Detailed participant inclusion and exclusion criteria

#### 1. Inclusion criteria

- Recipients of myeloablative or non-myeloablative allogeneic transplantation for any indication.
- Viral reactivation or infection with cytomegalovirus (CMV), adenovirus (AdV) or Epstein-Barre virus (EBV) *must* be present at the time of infusion as determined by:

- For CMV
  - CMV detectable by antigen detection, polymerase chain reaction (PCR) or culture in peripheral blood or tissue biopsy or by immunohistochemical staining on tissue biopsy specimen
- For AdV
  - Presence of AdV as detected by PCR, antigen detection or culture in body fluids including blood, stool, urine or nasopharyngeal secretions
- For EBV
  - Elevated EBV detectable in peripheral blood by PCR *or*
  - Presence of documented EBV related post-transplant lymphoproliferative disorder (PTLD) diagnosed by tissue biopsy *or*
  - Elevated EBV detectable in the blood by PCR *and* clinical or imaging findings consistent with EBV lymphoma
- Failure of standard therapy as defined by:
  - For CMV
    - The continued presence of detectable CMV virus or antigen after at least 14 days of antiviral therapy with intravenous Ganciclovir or Foscarnet
    - Recurrence of detectable CMV virus or antigen after at least 2 weeks of prior antiviral therapy
  - For AdV

- A less than 50% reduction in viral load in blood or any site of disease as measured by PCR or any quantitative assay despite use of therapy as determined by the treating physician;
  - Standard therapy may include intravenous Cidofovir within the limits of renal function
- For EBV
    - A less than 50% decrease in the size of EBV lymphoma or
    - A less than 50% decrease in the EBV viral load in peripheral blood despite use of appropriate therapy as determined by the treating physician which may include:
      - Reduction in immunosuppression
      - Rituximab 375mg/m<sup>2</sup> up to 4 infusions
      - Cytotoxic chemotherapy
- Adequate hepatic and renal function (< 3 x upper limit of normal for AST (SGOT), ALT (SGPT), < 2 x upper limit of normal for total bilirubin, serum creatinine)
  - ECOG status 0 to 3 or Lansky score 30-100
  - Patient (or legal representative) has given informed consent.

## 2. Exclusion criteria

- Use of anti-lymphocyte globulin (ALG, ATG, anti-CD52 or other broad spectrum lymphocyte antibody) given in the 4 weeks immediately prior to infusion or planned within 4 weeks after infusion.
- Grade II or greater graft versus host disease within 1 week prior to infusion.

- Prednisone or methylprednisolone at a dose of > 1 mg/kg (or equivalent in other steroid preparations) administered within 72 hours prior to cell infusion.
  - ECOG status 4 or Lansky score <30
  - Privately insured in or outpatients in New South Wales participating centers
3. Patients on corticosteroid and immunosuppressive medication must also adhere to the following rule:
- Patients receiving corticosteroids at a dose of less than 1 mg/kg body weight should have received corticosteroids for 7 days without dose reduction prior to infusion of virus-specific T-cells.

#### **Virus specific T-cell (VST) product release criteria and shipping information**

1. Prior to release of VSTs for infusion the following quality control criteria will all be satisfied:
  - Post-thaw viability > 50% by trypan blue exclusion
  - Bacterial and fungal sterility on culture of pre-freeze product
  - PCR negativity for Mycoplasma antigens on pre-freeze product
  - Less than 2% CD19<sup>+</sup>, less than 2% CD14<sup>+</sup>
2. Cryopreserved VST products were transported to peripheral centers in a validated dry shipper with a temperature data logger and product storage and transport form, in accordance with local guidelines.

## Tables

**Supplementary Table S1. Acute GVHD - staging for organ involvement**

| Stage | Skin                            | Liver                  | Gut                                                    |
|-------|---------------------------------|------------------------|--------------------------------------------------------|
| 1     | maculopapular rash <25% of body | bilirubin 25-40 umol/L | diarrhea 500 - 1000 ml/day<br>nausea/vomiting + biopsy |
| 2     | 25-50% of body                  | 40-74 umol/L           | 1000-1500 ml/day                                       |
| 3     | generalized erythroderma        | 75-200 umol/L          | 1500-2500 ml/day                                       |
| 4     | bullae/desquamation             | >300 umol/L            | >2500 ml/day or severe abdominal pain or ileus         |

**Supplementary Table S2. Acute GVHD - overall clinical grading based on individual organ staging**

| Grade | Skin   | Liver                | Gut    | Clinical Performance |
|-------|--------|----------------------|--------|----------------------|
| I     | 1 to 2 | 0                    | 0      | Normal               |
| II    | 1 to 3 | 1 (&/or) 1           | 1      | Mild decrease        |
| III   | 2 to 3 | 2 to 3 (&/or) 2 to 3 | 2 to 3 | Marked decrease      |
| IV    | 2 to 4 | 2 to 4 (&/or) 2 to 4 | 2 to 4 | Incapacitated        |

**Supplementary Table S3. Chronic GVHD – staging for organ involved**

|          | Mild (Score 1)                                                                                                               | Moderate (Score 2)                                                                                                          | Severe (Score 3)                                                                                                                                                                          |
|----------|------------------------------------------------------------------------------------------------------------------------------|-----------------------------------------------------------------------------------------------------------------------------|-------------------------------------------------------------------------------------------------------------------------------------------------------------------------------------------|
| Skin     | <18% BSA with disease signs but NO sclerotic features                                                                        | 19-50% BSA OR involvement with superficial sclerotic features “not hidebound” (able to pinch)                               | >50% BSA OR deep sclerotic features “hidebound” (unable to pinch) OR impaired mobility, ulceration or severe pruritus                                                                     |
| Mouth    | Mild symptoms with disease signs but not limiting oral intake significantly                                                  | Moderate symptoms with disease signs with partial limitation of oral intake                                                 | Severe symptoms with disease signs on examination with major limitation of oral intake                                                                                                    |
| Eyes     | Mild dry eye symptoms not affecting ADL (requiring eyedrops <3x per day) OR asymptomatic signs of keratoconjunctivitis sicca | Moderate dry eye symptoms partially affecting ADL (requiring drops >3x per day or punctal plugs), WITHOUT vision impairment | Severe dry eye symptoms significantly affecting ADL (special eyewear to relieve pain) OR unable to work because of ocular symptoms OR loss of vision caused by keratoconjunctivitis sicca |
| GI tract | Symptoms such as dysphagia, anorexia, nausea, vomiting, abdominal pain or diarrhea without significant weight loss (<5%)     | Symptoms associated with mild to moderate weight loss (5- 15%)                                                              | Symptoms associated with significant weight loss >15%, requires nutritional supplement for most calorie needs OR esophageal dilation                                                      |

|                   |                                                                                                                                    |                                                                                                                                                  |                                                                                                                                                            |
|-------------------|------------------------------------------------------------------------------------------------------------------------------------|--------------------------------------------------------------------------------------------------------------------------------------------------|------------------------------------------------------------------------------------------------------------------------------------------------------------|
| Liver             | Elevated Bilirubin, AP*, AST or ALT <2 x ULN                                                                                       | Bilirubin >3 mg/dl or Bilirubin, enzymes 2-5 x ULN                                                                                               | Bilirubin or enzymes > 5 x ULN                                                                                                                             |
| Lungs†            | Mild symptoms (shortness of breath after climbing one flight of steps)<br>FEV1 60-79% OR LFS 3-5                                   | Moderate symptoms (shortness of breath after walking on flat ground)<br>FEV1 40-59% OR LFS 6-9                                                   | Severe symptoms (shortness of breath at rest; requiring O2)<br>FEV1 <39% OR LFS 10-12                                                                      |
|                   | LFS score calculated by adding FEV1 and DLCO score as follows: ≥80% = 1; 70-79% = 2; 60-69% = 3; 50-59% = 4; 40-49% = 5; <40% = 6. |                                                                                                                                                  |                                                                                                                                                            |
| Joints and fascia | Mild tightness of arms or legs, normal or mild decreased range of motion (ROM) AND not affecting ADL                               | Tightness of arms or legs OR joint contractures, erythema thought due to fasciitis, moderate decrease ROM AND mild to moderate limitation of ADL | Contractures WITH significant decrease of ROM AND significant limitation of ADL (unable to tie shoes, button shirts, dress self etc.)                      |
| Genital tract     | Symptomatic with mild signs on exam AND no effect on coitus and minimal discomfort with gynecologic exam                           | Symptomatic with moderate signs on exam AND with mild dyspareunia or discomfort with gynecologic exam                                            | Symptomatic WITH advanced signs (stricture, labial agglutination or severe ulceration) AND severe pain with coitus or inability to insert vaginal speculum |

This table is adapted from Figure 1 Organ scoring of chronic GVHD in Filipovich *et al.*<sup>1</sup>

\*AP may be elevated in growing children, and not reflective of liver dysfunction.

†Pulmonary scoring should be performed using both the symptom and pulmonary function testing (PFT) scale whenever possible. When discrepancy exists between pulmonary symptom or PFT scores the higher value should be used for final scoring. Scoring using the Lung Function Score (LFS) is preferred, but if DLCO (adjusted for hematocrit but not alveolar volume) is not available, grading using FEV1 should be used. GVHD indicates graft versus host disease; ADL, activities of daily living; LFTs, liver function tests; AP, alkaline phosphatase; ALT, alanine aminotransferase; AST, aspartate aminotransferase; ULN, upper limit of normal

#### Supplementary Table S4. CMV assay by participating center

| Participating Center                           | CMV PCR quantitation assay                       |
|------------------------------------------------|--------------------------------------------------|
| Lady Cilento Children's Hospital, Brisbane     | Qiagen Artus® PCR kit                            |
| Royal Adelaide Hospital, Adelaide              | 'In-house' PCR assay                             |
| Royal North Shore Hospital, Sydney             | Roche COBAS®AmpliPrep/COBAS® TaqMan®<br>CMV test |
| Sydney Children's Hospital, Sydney             | Argene CMV R-gene®                               |
| The Children's Hospital at Westmead,<br>Sydney | Argene CMV R-gene®                               |
| Westmead Hospital, Sydney                      | Roche COBAS®AmpliPrep/COBAS® TaqMan®<br>CMV test |

Abbreviations: CMV, cytomegalovirus; PCR, polymerase chain reaction.

**Supplementary Table S5. Detailed CMV drug resistance mutations**

| Patient | UL54                       | UL97  |
|---------|----------------------------|-------|
| 1       | Q578H, T700A, E756D, A834P | M460V |
| 5       | I726T                      | ND    |
| 6       | ND                         | ND    |
| 10      | ND                         | ND    |
| 11      | L802M*                     | ND    |
| 12      | I726T                      | ND    |
| 13      | I726T                      | ND    |
| 14      | ND                         | ND    |
| 15      | ND                         | A594V |
| 16      | ND                         | ND    |
| 25      | ND†                        | ND    |
| 27      | ND                         | ND    |

Abbreviations: ND- no mutation detected.

\*CMV drug mutation 7 days after 1st VST.

†No sequence results available for UL54 primer 1-4 due to technical issues.

**Supplementary Table S6. Non-VST targeted infections**

| Patient         | Viral                                                                  |
|-----------------|------------------------------------------------------------------------|
| 1*, 10, 15, 18  | Rhinovirus RTI                                                         |
| 2, 3, 6, 11, 22 | EBV reactivation (quantitative) not requiring therapy                  |
| 2,4             | Herpes zoster                                                          |
| 4               | Hepatitis C-related liver cirrhosis (progression)                      |
| 5, 17*          | Human metapneumovirus RTI                                              |
| 5*, 24*         | Respiratory syncytial virus RTI                                        |
| 5*, 6*, 16*     | Herpes simplex virus 1 ulceration (oral)                               |
| 5, 11, 13       | BK virus reactivation (urine)                                          |
| 9*              | Rhinovirus + Influenza A(H3) RTI                                       |
| 10              | Rhinovirus + Parainfluenza RTI                                         |
| 11*†            | Disseminated adenovirus (blood, GIT, stool, urine)                     |
| 13*             | Polyoma virus (non-JC, non-BK) in CSF                                  |
| 13*             | EBV PCR+ in brain, CSF and BMAT without viral cytopathic tissue change |
| 13*             | Polyoma virus in BMAT without viral cytopathic change                  |
| 19*             | Rotavirus diarrhea                                                     |
| 24*             | Human herpesvirus 6 (blood, marrow, CSF)                               |
| 24*†            | Cerebral EBV PTLD                                                      |
| 26              | Adenovirus reactivation (blood) not requiring therapy                  |
| 27              | Parainfluenza RTI                                                      |

| Patient | Bacterial                                                                   |
|---------|-----------------------------------------------------------------------------|
| 1       | Aeromonas in stool culture                                                  |
| 1*      | Escherichia coli UTI                                                        |
| 6*      | Streptococcus pneumoniae pneumonia/sepsis                                   |
| 9*†     | Pseudomonas putida pneumonia/sepsis + Enterococcus faecium pneumonia/sepsis |
| 10      | Pseudomonas aeruginosa (sputum)                                             |
| 14*     | Serratia marcescens bacteremia (line-related)                               |
| 16*     | Enterococcus faecium UTI/sepsis                                             |
| 17*†    | Enterococcus faecium pneumonia/empyema                                      |
| 18*     | Pseudomonas aeruginosa RTI                                                  |
| 18*, 28 | Clostridium difficile (stool)                                               |
| 23*     | Enterococcus faecalis and Enterobacter cloacae UTI                          |
| 24*     | Corynebacterium species (BAL)                                               |
| 24*     | Pseudomonas aeruginosa bacteremia                                           |
| Patient | Fungal                                                                      |
| 6       | Candida albicans (sputum)                                                   |
| 8       | Candida glabrata (vaginal thrush)                                           |
| 9*      | Saccharomyces cerevisiae (BAL)                                              |
| 9*, 12* | Treatment for presumed respiratory invasive fungal infection                |
| 15*†    | Presumed Pneumocystis jirovecii pneumonia                                   |
| 24*     | Candida species (BAL)                                                       |
| Patient | Presumed infection - no organism identified                                 |
| 7*      | RTI                                                                         |
| 20*     | RLL pneumonia                                                               |
| 24*     | Orbital cellulitis                                                          |
| 26*     | Febrile (not neutropenic)                                                   |
| Patient | Parasitic                                                                   |
| 13*†    | Disseminated toxoplasma gondii (cerebral, CSF, blood and BMAT)              |

Abbreviations: VST, virus-specific T cells; RTI, respiratory tract infection; EBV, Epstein-Barr virus; GIT, gastrointestinal; CSF, cerebral spinal fluid; BM, bone marrow; PTLN, post-transplant lymphoproliferative disease; UTI, urinary tract infection; BAL, bronchoalveolar lavage; RLL, right lower lobe.

\*Associated with hospitalization or prolongation of hospitalization.

†Contributed to death.

## Reference

1. Filipovich AH, Weisdorf D, Pavletic S, et al. National Institutes of Health consensus development project on criteria for clinical trials in chronic graft-versus-host disease: I. Diagnosis and staging working group report. *Biol Blood Marrow Transplant.* 2005;11(12):945-956.
